# Supplementary material
Source: PubMed Central journal article supplement (PMC7920172)
Supplement: ASN.2020071106SupplementaryData.pdf [file ASN.2020071106SupplementaryData.pdf]

# **A Randomized Trial of Anti-Interleukin-6 Antibody Clazakizumab in Late Antibody-Mediated Kidney Transplant Rejection**

Konstantin Doberer, Michael Duerr, Philip F. Halloran, Farsad Eskandary, Klemens Budde, Heinz Regele, Jeff Reeve, Anita Borski, Nicolas Kozakowski, Roman Reindl-Schwaighofer, Johannes Waiser, Nils Lachmann, Sabine Schranz, Christa Firbas, Jakob Mühlbacher, Georg Gelbenegger, Thomas Perkmann, Markus Wahrmann, Alexander Kainz, Robin Ristl, Fabian Halleck, Gregor Bond, Edward Chong, Bernd Jilma, and Georg A. Böhmig

| <b>Table of contents</b> | <b>Page</b> |
|--------------------------|-------------|
| <b>Table S1</b>          | 2-3         |
| <b>Table S2</b>          | 4-5         |
| <b>Table S3</b>          | 6-10        |
| <b>Table S4</b>          | 11          |
| <b>Table S5</b>          | 12          |
| <b>Figure S1</b>         | 13          |
| <b>Figure S2</b>         | 14          |
| <b>Figure S3</b>         | 15          |
| <b>Figure S4</b>         | 16          |
| <b>Figure S5</b>         | 17          |
| <b>Figure S6</b>         | 18          |
| <b>Figure S7</b>         | 19          |
| <b>Figure S8</b>         | 20          |
| <b>References</b>        | 21          |

**Supplementary Table 1.** Single lesions and molecular classifiers at baseline.

| <b>Parameter</b>                                                             | <b>Total<br/>(n=20)</b> | <b>Clazakizumab<br/>(n=10)</b> | <b>Placebo<br/>(n=10)</b> |
|------------------------------------------------------------------------------|-------------------------|--------------------------------|---------------------------|
| <b>Morphological ABMR lesions and scores</b>                                 |                         |                                |                           |
| Glomerulitis (g score $\geq 1$ ), n (%) <sup>a</sup>                         | 17 (89.5)               | 8 (80)                         | 9 (100)                   |
| g score, median (IQR)                                                        | 2 (1-3)                 | 2 (1-3)                        | 3 (1-3)                   |
| Peritubular capillaritis (ptc score $\geq 1$ ), n (%) <sup>b</sup>           | 13 (68.4)               | 6 (60)                         | 7 (77.8)                  |
| ptc score, median (IQR)                                                      | 2 (0-2)                 | 2 (0-2)                        | 2 (1-3)                   |
| Transplant glomerulopathy (cg score $\geq 1$ ), n (%)                        | 17 (89.5)               | 8 (80)                         | 9 (100)                   |
| cg score, median (IQR)                                                       | 3 (2-3)                 | 3 (1-3)                        | 3 (3-3)                   |
| C4d in peritubular capillaries (C4d score $\geq 1$ ), n (%)                  | 7 (35)                  | 4 (40)                         | 3 (30)                    |
| C4d score, median (IQR)                                                      | 0 (0-2)                 | 0 (0-2)                        | 0 (0-1)                   |
| MLPTC, n (%) <sup>c</sup>                                                    | 6 (42.9)                | 2 (25)                         | 4 (66.7)                  |
| High-grade MLPTC, n (%) <sup>c</sup>                                         | 2 (14.3)                | 1 (12.5)                       | 1 (16.7)                  |
| Interstitial fibrosis (ci score $\geq 1$ ), n (%)                            | 17 (85)                 | 8 (80)                         | 9 (90)                    |
| ci score, median (IQR)                                                       | 2 (1-3)                 | 2 (1-2)                        | 2 (1-3)                   |
| Tubular atrophy (ct score $\geq 1$ ), n (%)                                  | 17 (85)                 | 8 (80)                         | 9 (90)                    |
| ct score, median (IQR)                                                       | 1 (1-2)                 | 1 (1-2)                        | 2 (1-2)                   |
| Vascular fibrous intimal thickening (cv score $\geq 1$ ), n (%) <sup>d</sup> | 15 (88.2)               | 6 (75)                         | 9 (100)                   |
| cv score, median (IQR)                                                       | 1 (1-2)                 | 1 (0-2)                        | 2 (1-2)                   |

### **Molecular classifiers of rejection and injury**

|                                      |                  |                  |                  |
|--------------------------------------|------------------|------------------|------------------|
| ABMR score, median (IQR)             | 0.65 (0.35-0.81) | 0.70 (0.48-0.81) | 0.44 (0.29-0.82) |
| TCMR score, median (IQR)             | 0.01 (0.01-0.18) | 0.01 (0.01-0.01) | 0.01 (0.01-0.02) |
| 'all Rejection' score, median (IQR)  | 0.69 (0.43-0.83) | 0.73 (0.44-0.84) | 0.53 (0.42-0.80) |
| Atrophy/Fibrosis score, median (IQR) | 0.68 (0.35-0.84) | 0.39 (0.24-0.78) | 0.79 (0.67-0.87) |

---

ABMR, antibody-mediated rejection; DSA, donor-specific antibody; IQR, interquartile range; MFI, mean fluorescence intensity; MLPTC, multilayering of peritubular capillary basement membranes; TCMR, T cell mediated rejection.

<sup>a</sup>For 1 patient (placebo group), biopsy material was not sufficient for g and cg scoring.

<sup>b</sup>For 1 patient (placebo group), biopsy material was not adequate for ptc scoring.

<sup>c</sup>Material for ultrastructural analysis of peritubular capillaries was available for 14 recipients (clazakizumab: n=8, placebo: n=6).

<sup>d</sup>cv score was not available for 2 recipients in the clazakizumab arm and 1 in the placebo arm (biopsy material inadequate for complete lesion scoring).

**Supplementary Table 2.** Baseline immunosuppression.

| <b>Parameter</b>                                        | <b>Total<br/>(n=20)</b> | <b>Clazakizumab<br/>(n=10)</b> | <b>Placebo<br/>(n=10)</b> |
|---------------------------------------------------------|-------------------------|--------------------------------|---------------------------|
| <b>Initial immunosuppression</b>                        |                         |                                |                           |
| Induction with antithymocyte globulin, n (%)            | 6 (30)                  | 3 (30)                         | 3 (30)                    |
| Induction with Interleukin-2 receptor antibody, n (%)   | 8 (40)                  | 5 (50)                         | 3 (30)                    |
| Tacrolimus, n (%)                                       | 9 (45)                  | 4 (40)                         | 5 (50)                    |
| Cyclosporine A, n (%)                                   | 10 (50)                 | 5 (50)                         | 5 (50)                    |
| Everolimus, n (%)                                       | 1 (5)                   | 1 (10)                         | 0                         |
| Azathioprine, n (%)                                     | 2 (10)                  | 1 (10)                         | 1 (10)                    |
| Mycophenolic acid derivatives, n (%)                    | 17 (85)                 | 8 (80)                         | 9 (90)                    |
| Peri-transplant immunoadsorption, n (%) <sup>a</sup>    | 5 (25)                  | 3 (30)                         | 2 (20)                    |
| CDC crossmatch conversion before transplantation, n (%) | 3 (15)                  | 2 (20)                         | 1 (10)                    |
| <b>Immunosuppression at the time of study inclusion</b> |                         |                                |                           |
| Triple immunosuppression                                | 18 (90)                 | 9 (90)                         | 9 (90)                    |
| Dual immunosuppression without steroids                 | 2 (10)                  | 1 (10)                         | 1 (10)                    |
| <b>Immunosuppressants</b>                               |                         |                                |                           |
| Tacrolimus, n (%)                                       | 13 (65)                 | 6 (60)                         | 7 (70)                    |
| Trough level (ng/mL), median (IQR)                      | 6.0 (5.2-7.1)           | 5.6 (4.3-7.4)                  | 6.0 (5.6-7.0)             |
| Cyclosporine A, n (%)                                   | 6 (30)                  | 4 (40)                         | 2 (20)                    |
| Trough level (ng/mL), median (IQR)                      | 123 (103-152)           | 138 (115-170)                  | 85, 114                   |

|                               |                   |                   |                   |
|-------------------------------|-------------------|-------------------|-------------------|
| Everolimus, n (%)             | 1 (5)             | 0                 | 1(10)             |
| Trough level (mg/mL)          | 5.4               | -                 | 5.4               |
| MMF, n (%)                    | 10 (50)           | 6 (60)            | 4 (40)            |
| Daily dose (mg), median (IQR) | 1,250 (938-2,000) | 1,250 (938-2,000) | 1,250 (625-1,875) |
| EC-MPA, n (%)                 | 10 (50)           | 4 (40)            | 6 (60)            |
| Daily dose (mg), median (IQR) | 720 (360-1,170)   | 1,260 (810-1,440) | 450 (315-720)     |
| Prednisolone, n (%)           | 15 (75)           | 8 (80)            | 7 (70)            |
| Daily dose (mg), median (IQR) | 5 (5-5)           | 5 (5-5)           | 5 (5-5)           |
| Methylprednisolone, n (%)     | 3 (15)            | 1 (10)            | 2 (20)            |
| Daily dose (mg), median (IQR) | 4 (4-4)           | 4                 | 4, 4              |

---

CDC, complement-dependent cytotoxicity; EC-MPA, enteric-coated mycophenolic acid; IQR, interquartile range; MMF, mycophenolate mofetil.

<sup>a</sup>Following our local standard, sensitized patients (until 2009:  $\geq 40\%$  CDC-PRA; since 2009: preformed DSA) were subjected to an earlier detailed protocol of peri-transplant immunoadsorption<sup>1</sup>.

**Supplementary Table 3.** Adverse events by system organ class.

| Adverse events                                                 | Part A <sup>a</sup>    |                   | Part B                              |
|----------------------------------------------------------------|------------------------|-------------------|-------------------------------------|
|                                                                | Clazakizumab<br>(n=10) | Placebo<br>(n=10) | Clazakizumab<br>(n=19) <sup>b</sup> |
| Number of adverse events                                       | 50                     | 44                | 129                                 |
| Number of serious adverse events                               | 3                      | 1                 | 9                                   |
| Number (%) of patients with one or more adverse events         | 10 (100)               | 10 (100)          | 18 (90)                             |
| Number (%) of patients with one or more serious adverse events | 3 (30)                 | 1 (10)            | 7 (35)                              |
| <b>Adverse events, number (%) of patients</b>                  |                        |                   |                                     |
| <b>Infections and infestations</b>                             | <b>5 (50)</b>          | <b>8 (80)</b>     | <b>13 (68.4)</b>                    |
| Upper respiratory tract infection                              | 5 (50)                 | 6 (60)            | 8 (42.1)                            |
| Urethritis and/or cystitis                                     | 1 (10)                 | 2 (20)            | 3 (15.8)                            |
| Bronchitis                                                     | 0                      | 0                 | 4 (21.1)                            |
| Herpes simplex                                                 | 0                      | 0                 | 3 (15.8)                            |
| Pneumonia                                                      | 0                      | 0                 | 2 (10.5)                            |
| Aseptic meningitis                                             | 0                      | 0                 | 1 (5.3)                             |
| Coxsackie viral infection                                      | 0                      | 0                 | 1 (5.3)                             |
| Ovarian abscess                                                | 0                      | 0                 | 1 (5.3)                             |
| Pyelonephritis                                                 | 0                      | 0                 | 1 (5.3)                             |
| Skin papilloma                                                 | 0                      | 0                 | 1 (5.3)                             |
| <b>Gastrointestinal disorders</b>                              | <b>5 (50)</b>          | <b>7 (70)</b>     | <b>11 (57.9)</b>                    |

|                                                           |                     |               |                      |
|-----------------------------------------------------------|---------------------|---------------|----------------------|
| Diarrhoea                                                 | 4 (40)              | 3 (30)        | 6 (31.6)             |
| Abdominal pain                                            | 2 (20)              | 3 (30)        | 0                    |
| Gastroenteritis                                           | 2 (20)              | 0             | 2 (10.5)             |
| Nausea and/or vomiting                                    | 0                   | 2 (20)        | 2 (10.5)             |
| Diverticulitis                                            | 1 (10) <sup>c</sup> | 0             | 1 (5.3) <sup>d</sup> |
| Dyspepsia                                                 | 0                   | 0             | 2 (10.5)             |
| Aphthous ulcer                                            | 1 (10)              | 0             | 1 (5.3)              |
| Dry mouth                                                 | 0                   | 0             | 1 (5.3)              |
| Gastritis                                                 | 0                   | 1 (10)        | 0                    |
| Haemorrhoids                                              | 0                   | 0             | 1 (5.3)              |
| Noninfective gingivitis                                   | 0                   | 0             | 1 (5.3)              |
| Pancreatic enzyme abnormality                             | 0                   | 0             | 1 (5.3)              |
| <b>General disease and administration site conditions</b> | <b>3 (30)</b>       | <b>5 (50)</b> | <b>10 (52.6)</b>     |
| Oedema                                                    | 2 (20)              | 3 (30)        | 6 (31.6)             |
| Injection site reactions                                  | 1 (10)              | 0             | 3 (15.8)             |
| Fatigue                                                   | 0                   | 1 (10)        | 2 (10.5)             |
| Malaise                                                   | 1 (10)              | 0             | 1 (5.3)              |
| Pyrexia                                                   | 0                   | 1 (10)        | 0                    |
| <b>Skin and subcutaneous disorders</b>                    | <b>1 (10)</b>       | <b>2 (20)</b> | <b>8 (42.1)</b>      |
| Erysipela                                                 | 0                   | 0             | 2 (10.5)             |
| Alopecia                                                  | 0                   | 1 (10)        | 1 (5.3)              |

|                                                        |               |               |                 |
|--------------------------------------------------------|---------------|---------------|-----------------|
| Eczema                                                 | 0             | 1 (10)        | 1 (5.3)         |
| Pruritus                                               | 1 (10)        | 1 (10)        | 0               |
| Blister                                                | 0             | 0             | 1 (5.3)         |
| Dry skin                                               | 0             | 0             | 1 (5.3)         |
| Hirsutism                                              | 0             | 0             | 1 (5.3)         |
| Impetigo                                               | 0             | 0             | 1 (5.3)         |
| Intertrigo                                             | 0             | 0             | 1 (5.3)         |
| Rash                                                   | 1 (10)        | 0             | 0               |
| <b>Vascular disorders</b>                              | <b>2 (20)</b> | <b>4 (40)</b> | <b>5 (26.3)</b> |
| Accelerated hypertension                               | 2 (20)        | 3 (30)        | 3 (15.8)        |
| Hypotension                                            | 0             | 1 (10)        | 1 (5.3)         |
| Deep vein thrombosis                                   | 1 (10)        | 0             | 0               |
| Thrombophlebitis                                       | 0             | 0             | 1 (5.3)         |
| <b>Musculoskeletal and connective tissue disorders</b> | <b>4 (40)</b> | <b>2 (20)</b> | <b>4 (21.1)</b> |
| Musculoskeletal pain                                   | 2 (20)        | 1 (10)        | 3 (15.8)        |
| Muscle cramps                                          | 3 (30)        | 1 (10)        | 1 (5.3)         |
| Tenosynovitis                                          | 0             | 0             | 1 (5.3)         |
| <b>Nervous system disorders</b>                        | <b>0</b>      | <b>4 (40)</b> | <b>5 (26.3)</b> |
| Headache                                               | 0             | 3 (30)        | 4 (21.1)        |
| Numbness                                               | 0             | 1 (10)        | 1 (5.3)         |
| <b>Respiratory, thoracic and mediastinal disorders</b> | <b>2 (20)</b> | <b>1 (10)</b> | <b>4 (21.1)</b> |



|                                                      |               |               |                 |
|------------------------------------------------------|---------------|---------------|-----------------|
| Dyspnea                                              | 1 (10)        | 1 (10)        | 2 (10.5)        |
| Cough                                                | 0             | 0             | 3 (15.8)        |
| Chest pain                                           | 0             | 0             | 1 (5.3)         |
| Epistaxis                                            | 0             | 0             | 1 (5.3)         |
| Nasal dryness                                        | 1 (10)        | 0             | 0               |
| Pleural effusion                                     | 1 (10)        | 0             | 1 (5.3)         |
| Small airway disease                                 | 1 (10)        | 0             | 0               |
| <b>Blood and lymphatic system disorders</b>          | <b>0</b>      | <b>2 (20)</b> | <b>2 (10.5)</b> |
| Anemia                                               | 0             | 2 (20)        | 1 (5.3)         |
| Leukopenia                                           | 0             | 1 (10)        | 1 (5.3)         |
| <b>Injury poisoning and procedural complications</b> | <b>1 (10)</b> | <b>2 (20)</b> | <b>1 (5.3)</b>  |
| Transplant biopsy complication <sup>e</sup>          | 1 (10)        | 2 (20)        | 0               |
| Traumatic bone or joint injury                       | 0             | 0             | 1 (5.3)         |
| <b>Cardiac disorders</b>                             | <b>2 (20)</b> | <b>0</b>      | <b>1 (5.3)</b>  |
| Atrial fibrillation                                  | 1 (10)        | 0             | 1 (5.3)         |
| Bradycardia                                          | 1 (10)        | 0             | 0               |
| Palpitations                                         | 1 (10)        | 0             | 0               |
| <b>Psychiatric disorders</b>                         | <b>0</b>      | <b>0</b>      | <b>3 (15.8)</b> |
| Sleep disturbance                                    | 0             | 0             | 3 (15.8)        |
| <b>Renal and urinary disorders</b>                   | <b>1 (10)</b> | <b>1 (10)</b> | <b>1 (5.3)</b>  |
| Acute renal injury                                   | 1 (10)        | 0             | 0               |

|                                                 |               |               |                 |
|-------------------------------------------------|---------------|---------------|-----------------|
| Aggravated proteinuria                          | 0             | 1 (10)        | 0               |
| Dysuria                                         | 0             | 0             | 1 (5.3)         |
| <b>Surgical and medical procedures</b>          | <b>1 (10)</b> | <b>0</b>      | <b>2 (10.5)</b> |
| Mole excision                                   | 1 (10)        | 0             | 0               |
| Nasal septum operation                          | 0             | 0             | 1 (5.3)         |
| Permanent thorax cavity drainage                | 0             | 0             | 1 (5.3)         |
| Pleurodesis                                     | 0             | 0             | 1 (5.3)         |
| <b>Eye disorders</b>                            | <b>0</b>      | <b>0</b>      | <b>2 (10.5)</b> |
| Ocular infection                                | 0             | 0             | 2 (10.5)        |
| <b>Ear and labyrinth disorders</b>              | <b>0</b>      | <b>1 (10)</b> | <b>0</b>        |
| Ear pain                                        | 0             | 1 (10)        | 0               |
| Otitis media                                    | 0             | 1 (10)        | 0               |
| <b>Metabolism and nutrition disorders</b>       | <b>0</b>      | <b>0</b>      | <b>1 (5.3)</b>  |
| Folate deficiency                               | 0             | 0             | 1 (5.3)         |
| Hyperkalemia                                    | 0             | 0             | 1 (5.3)         |
| <b>Reproductive system and breast disorders</b> | <b>0</b>      | <b>0</b>      | <b>1 (5.3)</b>  |
| Pelvic pain                                     | 0             | 0             | 1 (5.3)         |

---

<sup>a</sup>Differences between groups (part A) were nonsignificant.

<sup>b</sup>One patient was withdrawn from the trial in part A was not included in the safety analysis of part B.

<sup>c</sup>Diverticulitis resolved after percutaneous abscess drainage and antibiotic therapy.

<sup>d</sup>Diverticulitis was complicated by colon perforation requiring open surgery (Hartmann's procedure).

<sup>e</sup>Transplant biopsy complications included skin hematoma, peritransplant hematoma, and arteriovenous fistula.

**Supplementary Table 4. Diverticular disease and complications**

| Screening ID | Diverticulitis | Clazakizumab | Colon perforation | Diverticulosis | Assessment  | Gender | Age | Renal disease   | Yrs from Tx | Tx No. | Immunosuppression after inclusion |
|--------------|----------------|--------------|-------------------|----------------|-------------|--------|-----|-----------------|-------------|--------|-----------------------------------|
| #001_Vienna  | yes            | 2 doses      | no                | yes            | CT          | male   | 39  | IgA nephropathy | 9.9         | 1      | CyA, MMF, Pred                    |
| #002_Vienna  | no             | -            | -                 | no             | CT          | male   | 36  | Postrenal cause | 3.0         | 7      | Tac, EC-MPA, Pred                 |
| #003_Vienna  | no             | -            | -                 | no             | MRI         | female | 41  | Unknown         | 11.4        | 1      | Tac, EC-MPA, Pred                 |
| #004_Vienna  | no             | -            | -                 | no             | Colonoscopy | female | 37  | Pyelonehritis   | 16.5        | 1      | CyA, EC-MPA, Pred                 |
| #005_Vienna  | no             | -            | -                 | no             | CT          | female | 38  | Goodpasture     | 11.3        | 1      | Everolimus, EC- MPA, Pred         |
| #008_Vienna  | no             | -            | -                 | yes            | CT          | female | 62  | Unknown         | 18.9        | 1      | CyA, EC-MPA, Pred                 |
| #009_Vienna  | no             | -            | -                 | yes            | CT          | male   | 43  | FSGN            | 4.8         | 2      | Tac, MMF, Pred                    |
| #010_Vienna  | no             | -            | -                 | yes            | Colonoscopy | male   | 67  | Unknown         | 17.4        | 4      | CyA, EC-MPS, Pred                 |
| #011_Vienna  | no             | -            | -                 | yes            | CT          | female | 59  | Chronic GN      | 3.1         | 2      | Tac, MMF, Pred                    |
| #012_Vienna  | no             | -            | -                 | yes            | CT          | female | 60  | Pyelonephritis  | 18.2        | 1      | Tac, EC-MPA, Pred                 |
| #013_Vienna  | no             | -            | -                 | no             | CT          | female | 62  | Unknown         | 4.2         | 4      | Tac, MMF, Pred                    |
| #014_Vienna  | no             | -            | -                 | yes            | CT          | male   | 60  | Diabetic NP     | 1.6         | 1      | Tac, MMF, Pred                    |
| #001_Berlin  | no             | -            | -                 | -              | no imaging  | female | 29  | RPGN            | 11.4        | 1      | CyA, MMF, Methypred               |
| #015_Vienna  | no             | -            | -                 | yes            | CT          | female | 29  | Postrenal cause | 15.4        | 1      | Tac, MMF, Pred                    |
| #016_Vienna  | no             | -            | -                 | no             | Colonoscopy | female | 27  | RPGN            | 24.1        | 1      | Tac, EC-MPA, Pred                 |
| #002_Berlin  | no             | -            | -                 | -              | no imaging  | male   | 41  | IgA nephropathy | 9.4         | 1      | Tac, EC-MPA, Methypred            |
| #017_Vienna  | yes            | 4 doses      | yes               | yes            | CT          | male   | 62  | PKD             | 3.9         | 2      | Tac, MMF, Pred                    |
| #018_Vienna  | no             | -            | -                 | no             | Colonoscopy | male   | 42  | IgA nephropathy | 7.1         | 3      | Tac, EC-MPA, Pred                 |
| #003_Berlin  | no             | -            | -                 | -              | no imaging  | male   | 31  | IgA nephropathy | 6.8         | 1      | Tac, MMF, Methypred               |
| #004_Berlin  | no             | -            | -                 | -              | no imaging  | male   | 52  | Unknown         | 14.8        | 1      | CyA, MMF                          |

CT, computer tomography; CyA, cyclosporine A; EC-MPA, enteric-coated mycophenolol acid; GN, glomerulonephritis; IgA, immunoglobulin A; Methypred, methylprednisolone; MMF, mycophenolate mofetil; MRI, magnetic resonance imaging; NP, nephropathy; PKD, polycystic kidney disease; Pred, prednisolone; RPGN, rapid progressive glomerulonephritis; Tac, tacrolimus.

**Supplementary Table 5.** Resolution of ABMR activity in four recipients – Serial biopsy results

| Screening ID<br>(Randomization - Part A) | Biopsy  | ABMR category<br>(Banff 2017) | Banff single lesion scores |     |                |     | ABMR score<br>(MMDx) |
|------------------------------------------|---------|-------------------------------|----------------------------|-----|----------------|-----|----------------------|
|                                          |         |                               | g                          | ptc | cg             | c4d |                      |
| #004_Vienna<br>(Clazakizumab)            | Index   | Chronic active                | 2                          | 0   | 3              | 2   | 0.35                 |
|                                          | Week 11 | Chronic active                | 2                          | 0   | 3              | 0   | 0.21                 |
|                                          | Week 51 | Chronic <sup>a</sup>          | 1                          | 0   | 3              | 0   | 0.17                 |
| #008_Vienna<br>(Placebo)                 | Index   | Chronic active                | - <sup>b</sup>             | 3   | - <sup>b</sup> | 0   | 0.29                 |
|                                          | Week 11 | Chronic active                | 2                          | 1   | 3              | 0   | 0.25                 |
|                                          | Week 51 | Chronic <sup>a</sup>          | 1                          | 0   | 3              | 0   | 0.14                 |
| #0018_Vienna<br>(Placebo)                | Index   | Chronic active                | 1                          | 1   | 3              | 0   | 0.41                 |
|                                          | Week 11 | Chronic active                | 0                          | 2   | 2              | 0   | 0.34                 |
|                                          | Week 51 | Chronic <sup>a</sup>          | 1                          | 0   | 2              | 0   | 0.08                 |
| #004_Berlin<br>(Clazakizumab)            | Index   | Chronic active                | 2                          | 0   | 3              | 0   | 0.73                 |
|                                          | Week 11 | Chronic active                | 1                          | 1   | 2              | 0   | 0.86                 |
|                                          | Week 51 | Chronic <sup>a</sup>          | 1                          | 0   | 3              | 0   | 0.23                 |

ABMR, antibody-mediated rejection; cg, transplant glomerulopathy; g, glomerulitis; MMDx, molecular microscope diagnostic system; ptc, peritubular capillaritis.

<sup>a</sup>According to the Banff 2017 update<sup>2</sup>, the term “chronic ABMR” was applied for cg without evidence of current/recent antibody interaction with the endothelium, but with a prior documented diagnosis of chronic active ABMR.

<sup>b</sup>For one patient (#008\_Vienna), index biopsy material was not sufficient for g and cg scoring.

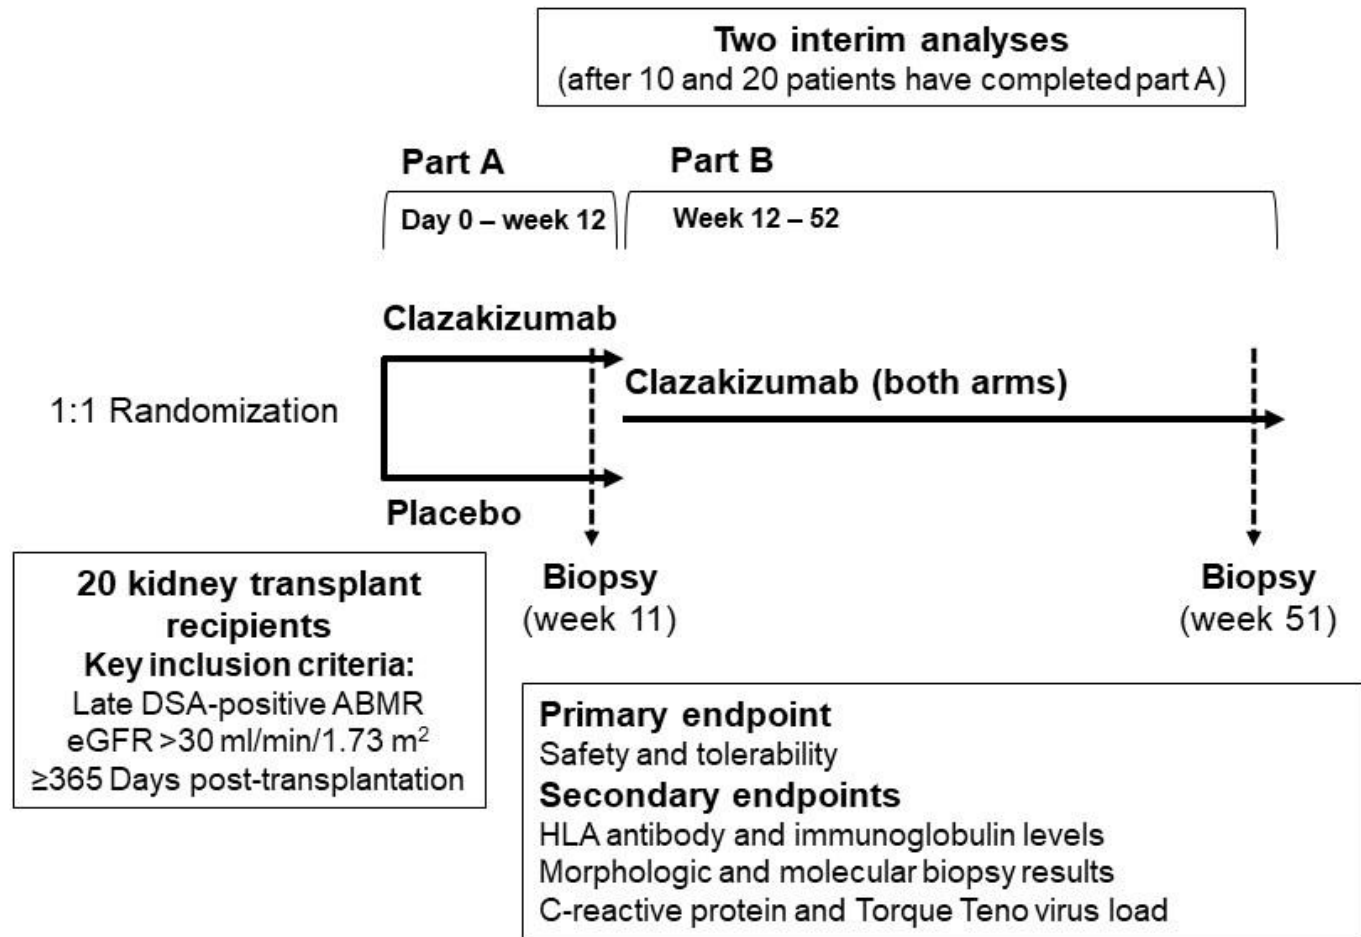

**Supplemental Figure 1.** Summary of trial protocol. ABMR=antibody-mediated rejection; DSA=donor-specific antibody, eGFR=estimated glomerular filtration rate; HLA=human leukocyte antigen.

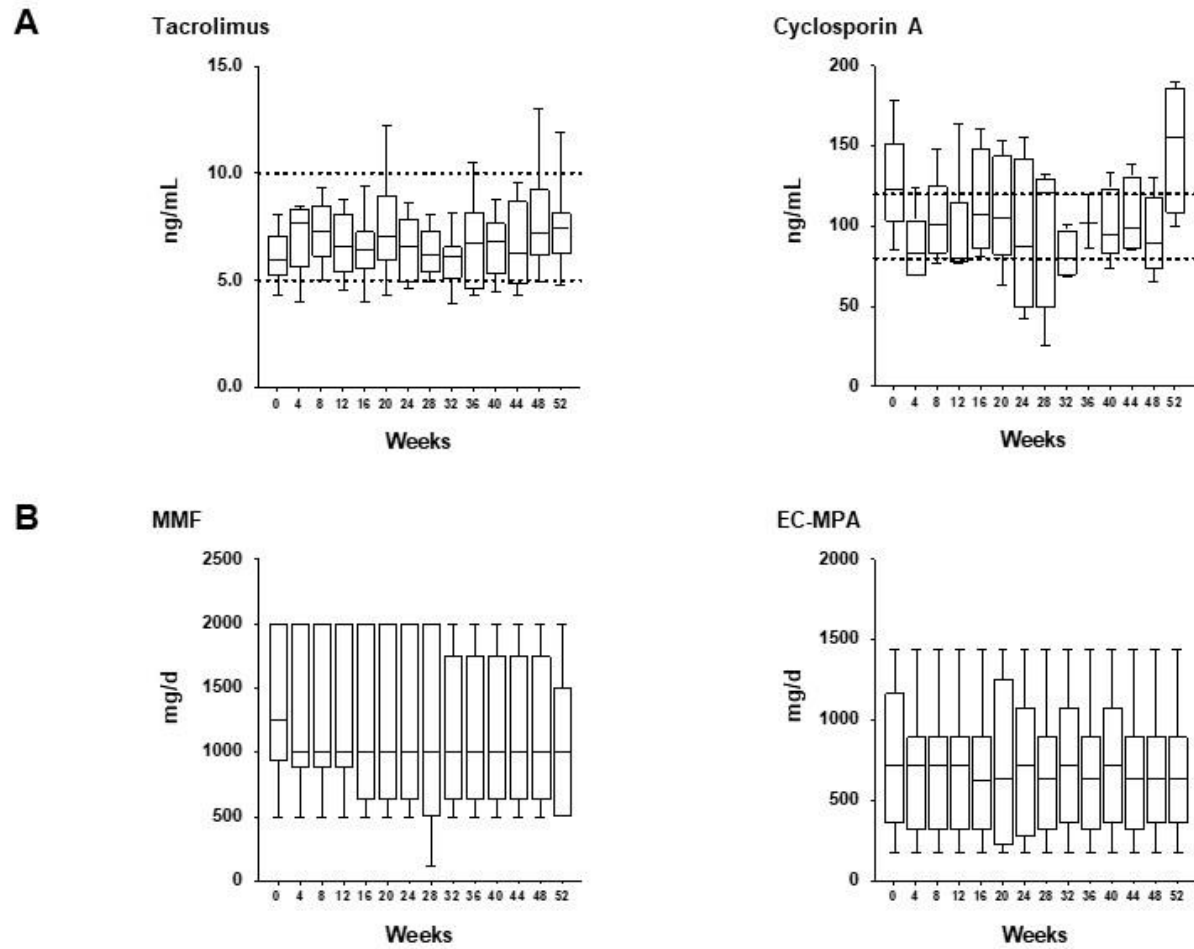

**Supplemental Figure 2.** Immunosuppression levels and dosage. Shown are (A) calcineurin inhibitor trough levels and (B) dosages of mycophenolate mofetil (MMF) and enteric-coated mycophenolic acid (EC-MPA). Horizontal dashed lines indicate the target range of trough levels.

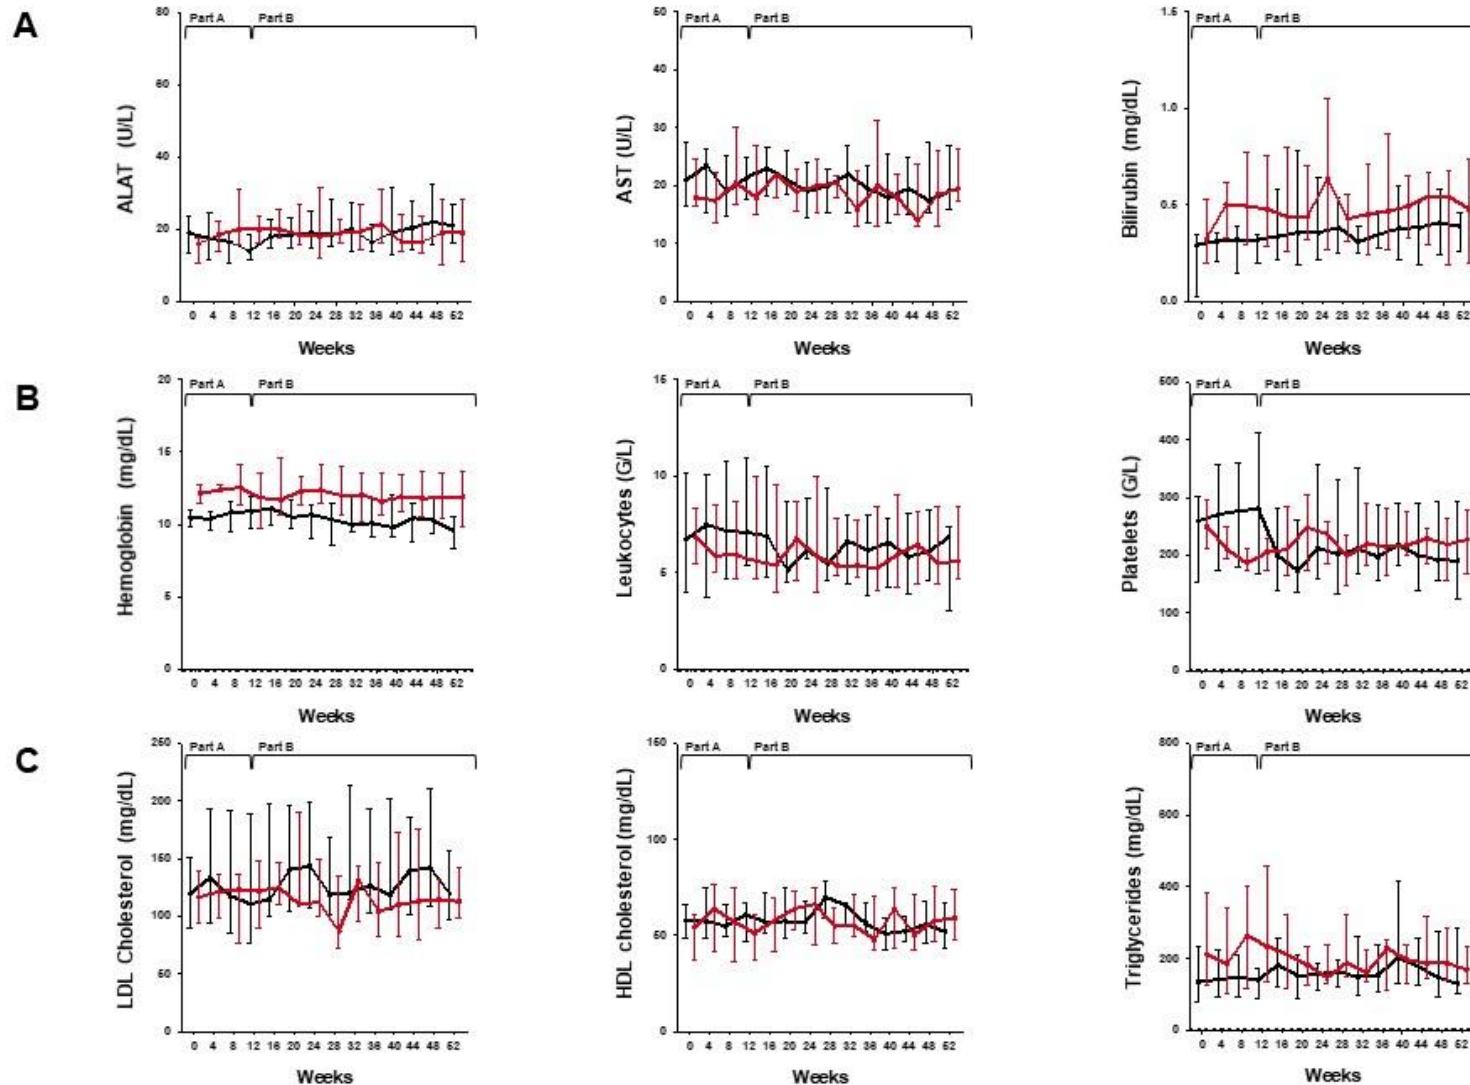

**Supplemental Figure 3.** Safety lab. Shown are median (interquartile range) levels of (A) liver parameters, (B) hematologic variables and (C) lipids (randomization in part A: placebo: black lines and bars; clazakizumab: red lines and bars). ALT = alanine aminotransferase; AST = aspartate aminotransferase; HDL = high-density lipoprotein; LDL = low-density lipoprotein.

**A****C-reactive protein**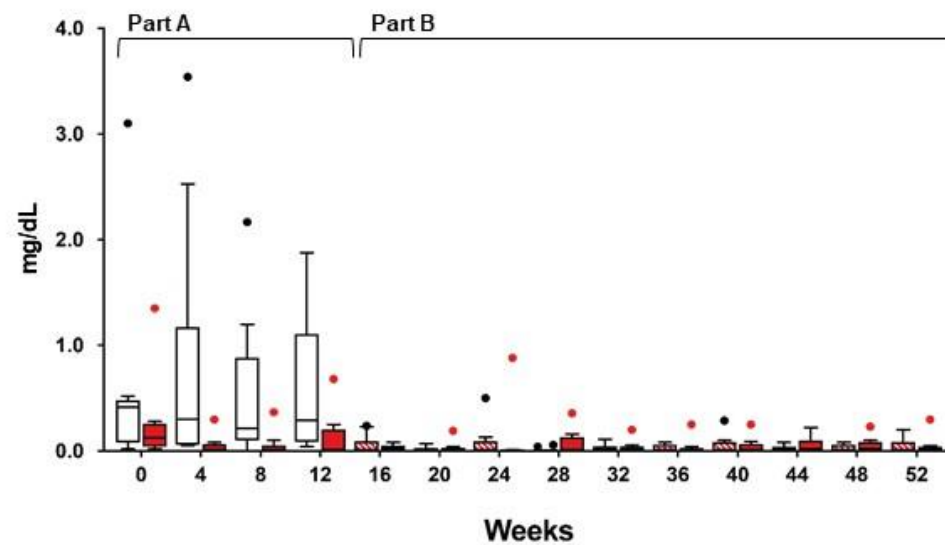**B****TTVload**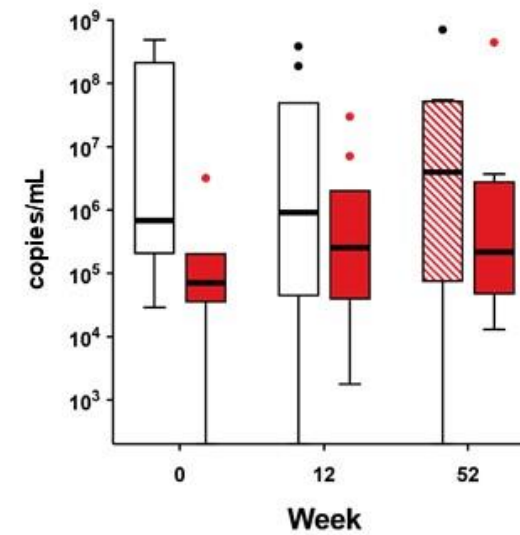

**Supplemental Figure 4.** C-reactive protein and Torque Teno Virus (TTV) levels. Shown are the levels of (A) C-reactive protein and (B) TTV viral load in patients randomized to clazakizumab (red closed boxplots) versus placebo (part A: open boxplots; part B: red hatched boxplots).



**A****Morphologic lesion scores****cg**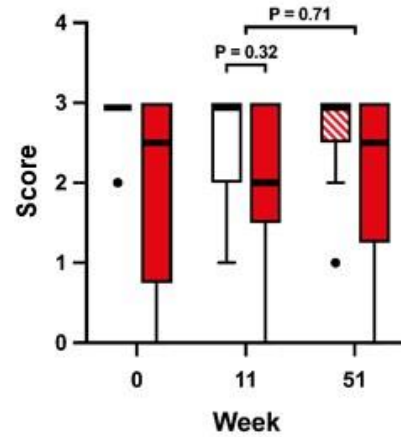**ci + ct**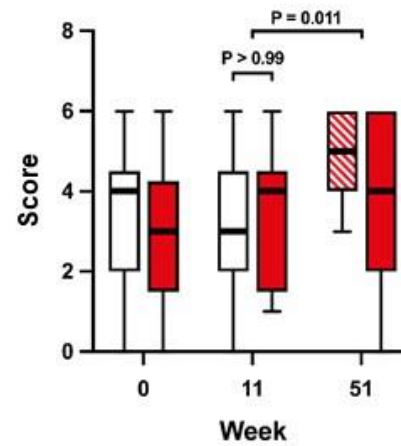**B****Molecular classifier****Atrophy/Fibrosis**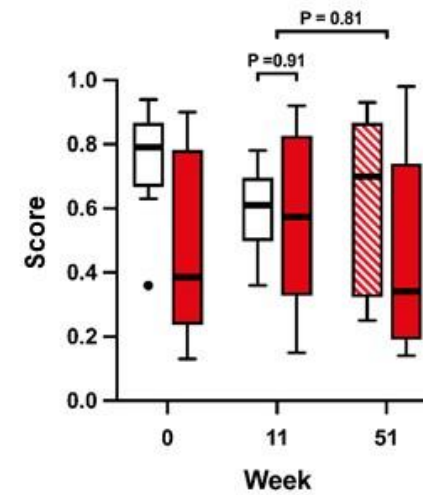

**Supplemental Figure 5.** Morphologic and molecular features of chronic injury. Morphologic (cg, ci+ct) and molecular (atrophy/fibrosis) scores are shown for patients randomized to clazakizumab (red closed boxplots) versus placebo (part A: open boxplots; part B: red hatched plots). We applied unpaired Mann Whitney U test for group comparisons (clazakizumab vs. placebo) at the end of part A and paired Wilcoxon test to evaluate changes under clazakizumab (overall cohort) in open-label extension (part B).

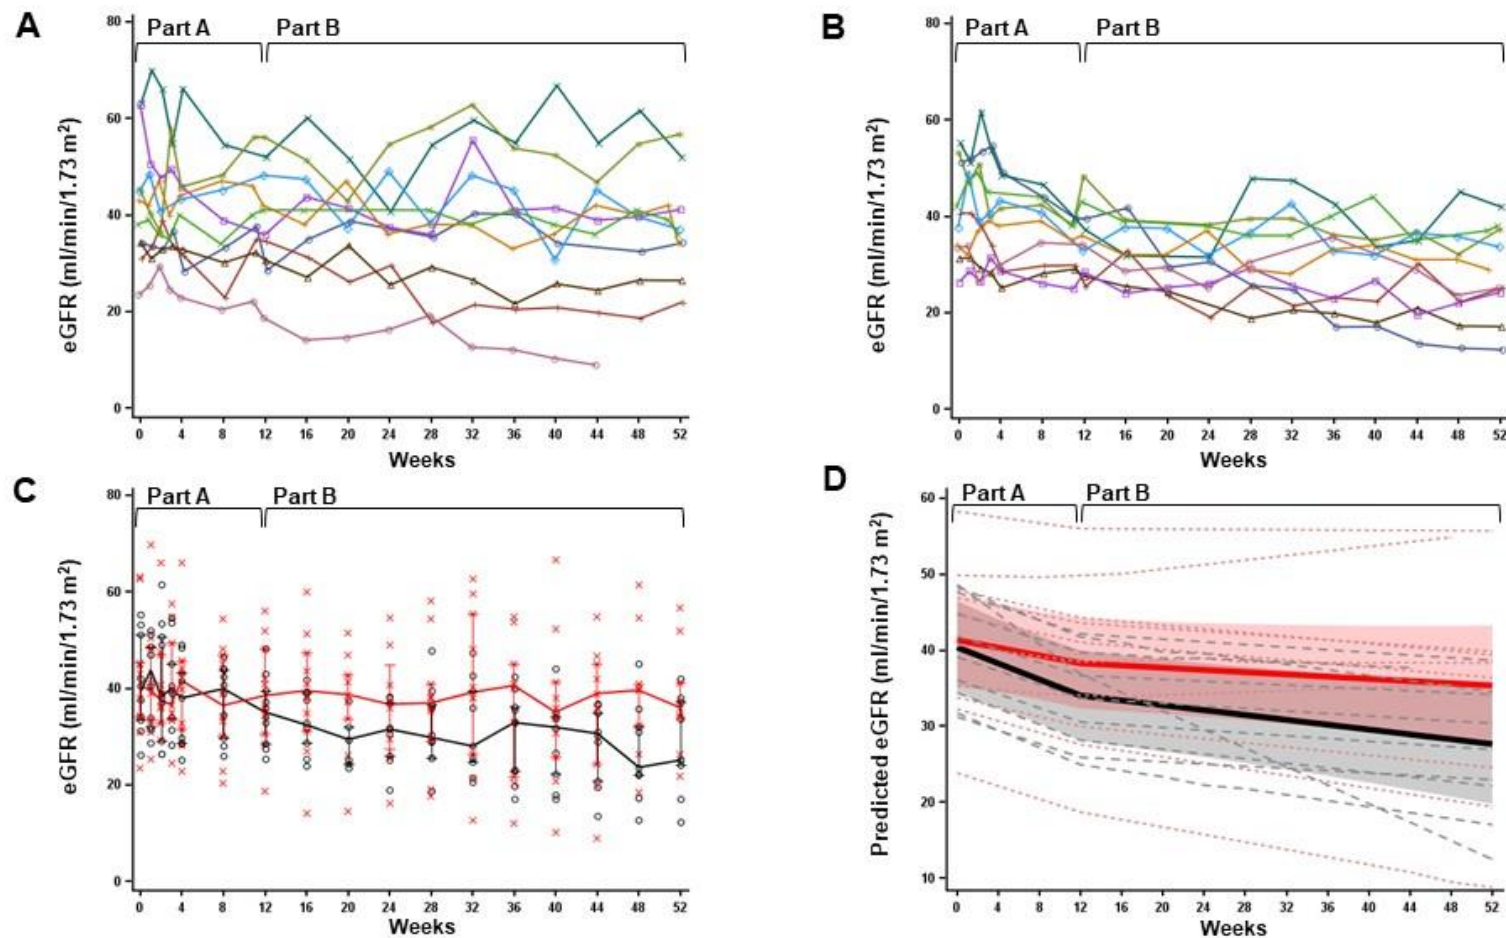

**Supplemental Figure 6.** Analysis of renal function including two patients withdrawn from the trial. The individual course of estimated glomerular filtration rate (eGFR) is shown for patients allocated to receive clazakizumab (A) versus placebo (B). Panel C shows median, interquartile range and individual levels of eGFR (clazakizumab: red line, bars and asterisks; placebo: black lines, bars and circles). Panel D shows individual (dashed lines) and mean eGFR slopes (solid lines; shaded areas represent 95% confidence intervals) in relation to treatment in part A (clazakizumab: red lines; placebo: black lines). In part A, the mean slope of eGFR differed significantly between groups ( $P=0.028$ ). In part B, patients switched from placebo to clazakizumab showed a significant improvement in the eGFR slope ( $P<0.001$ ), while inter-group differences became non-significant ( $P=0.40$ ).

**A**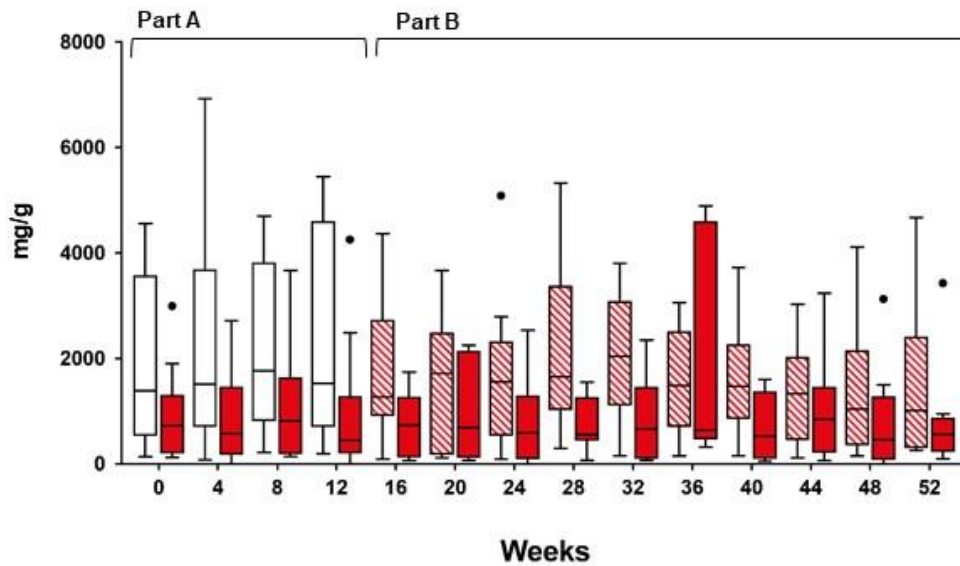**B**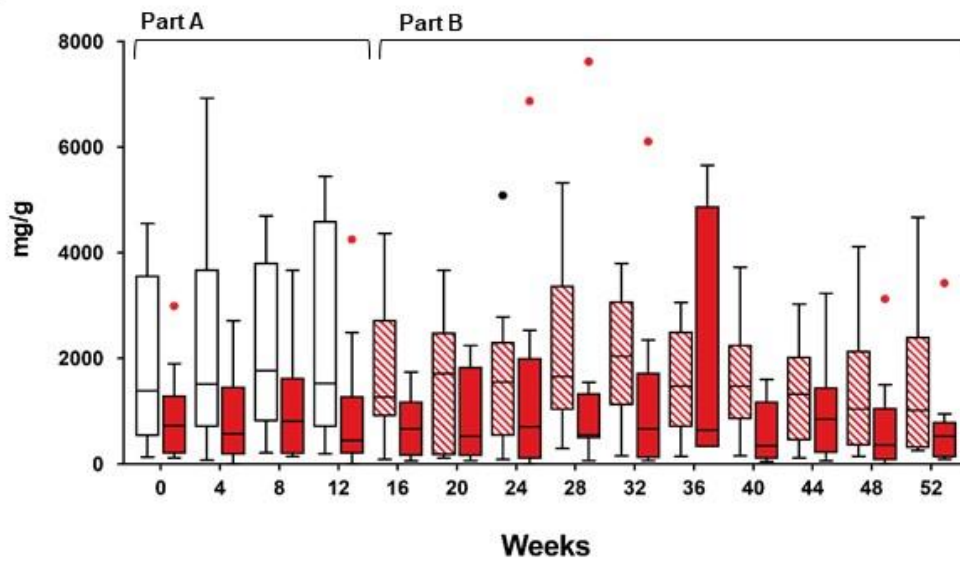

**Supplemental Figure 7.** Spot urine protein/creatinine ratio. Shown are the median levels of spot urine protein/creatinine ratio for patients randomized to clazakizumab (red closed boxplots) versus placebo (part A: open boxplots; part B: red hatched plots). Results are shown for patients on active treatment (A) and for all randomized patients including the two patients who were withdrawn from the trial because of serious adverse events (B).

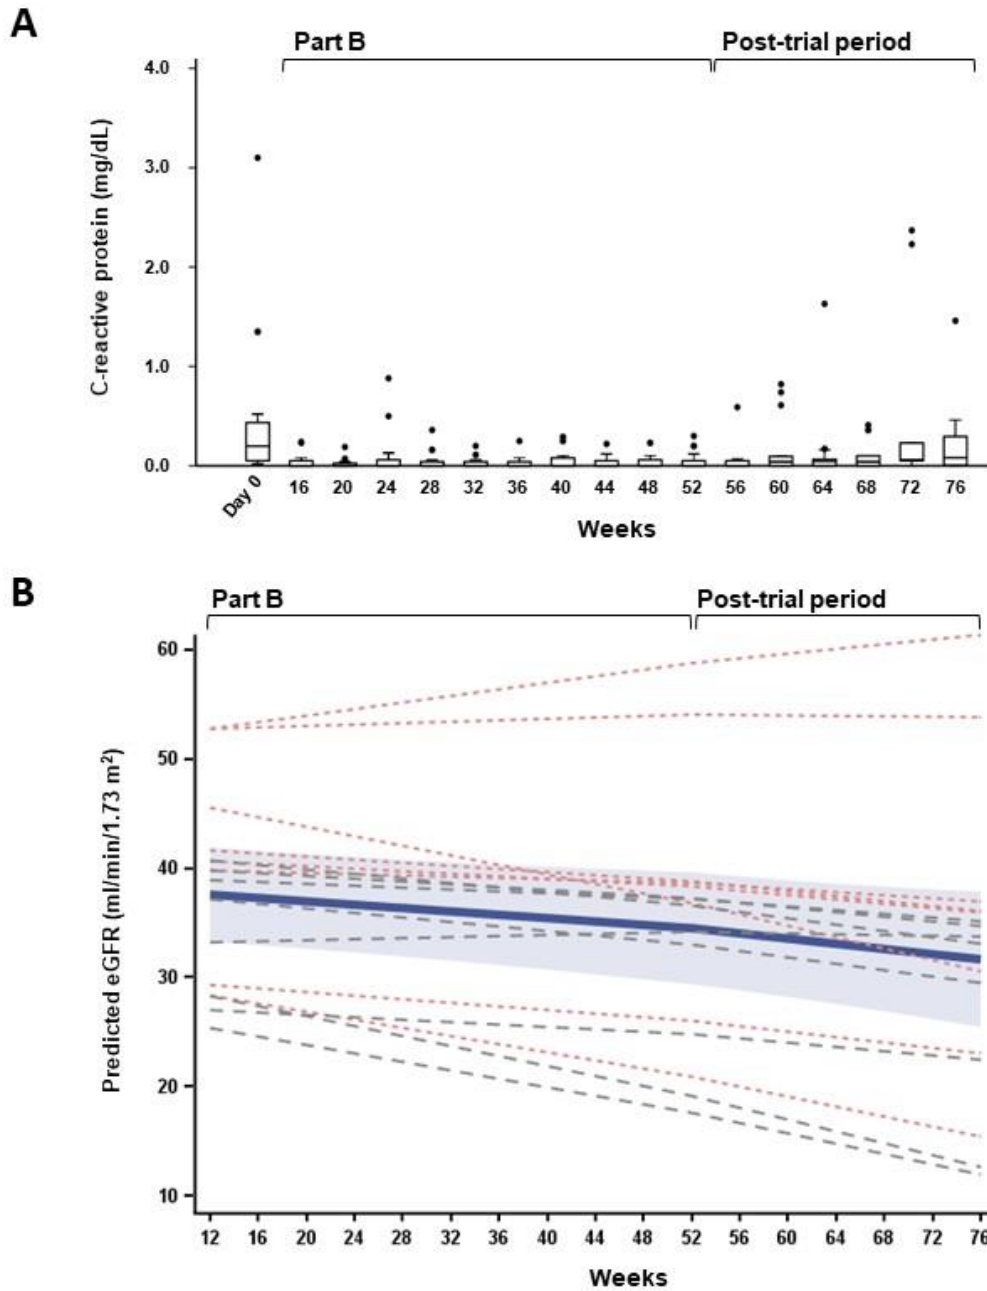

**Supplemental Figure 8.** C-reactive protein and renal function after the end of the trial. Boxplots in panel A show levels of C-reactive protein at day 0, during part B (clazakizumab in all patients), and over 6 months after the last trial visit. Panel B shows individual (dashed lines) and mean estimated glomerular filtration (eGFR) slopes (solid line; shaded areas represent 95% confidence intervals) calculated for part B and the 6-month post-trial period (the two patients withdrawn from the trial and another two recipients for whom only a single eGFR value was available for the post-trial period were excluded from the analysis).

## References

1. Schwaiger, E, Eskandary, F, Kozakowski, N, Bond, G, Kikic, Z, Yoo, D, et al.: Deceased donor kidney transplantation across donor-specific antibody barriers: predictors of antibody-mediated rejection. *Nephrol Dial Transplant*, 31: 1342-1351, 2016
2. Haas, M, Loupy, A, Lefaucheur, C, Roufosse, C, Glotz, D, Seron, D, et al.: The Banff 2017 Kidney Meeting Report: Revised diagnostic criteria for chronic active T cell-mediated rejection, antibody-mediated rejection, and prospects for integrative endpoints for next-generation clinical trials. *Am J Transplant*, 18: 293-307, 2018
